# Supplementary material for: Short communication: Significance assessment of historical surfacicplanform changes of mid-sized rivers: A Monte-Carlo basedapproach
Source: Copernicus journal article supplement (doi:10.5194/esurf-2019-52), 2019-11-05
Supplement: Supplementary file [file esurf-2019-52-AC1-supplement.zip]

Hereafter, we show statistical results verifying the normal distribution of errors in X and Y around nodes for 1950 and 1964. In tables, significant p-value mean that null hypothesis ( $H_0$  : the population is normally distributed) can be rejected. All histograms are also shown in Figure 3.

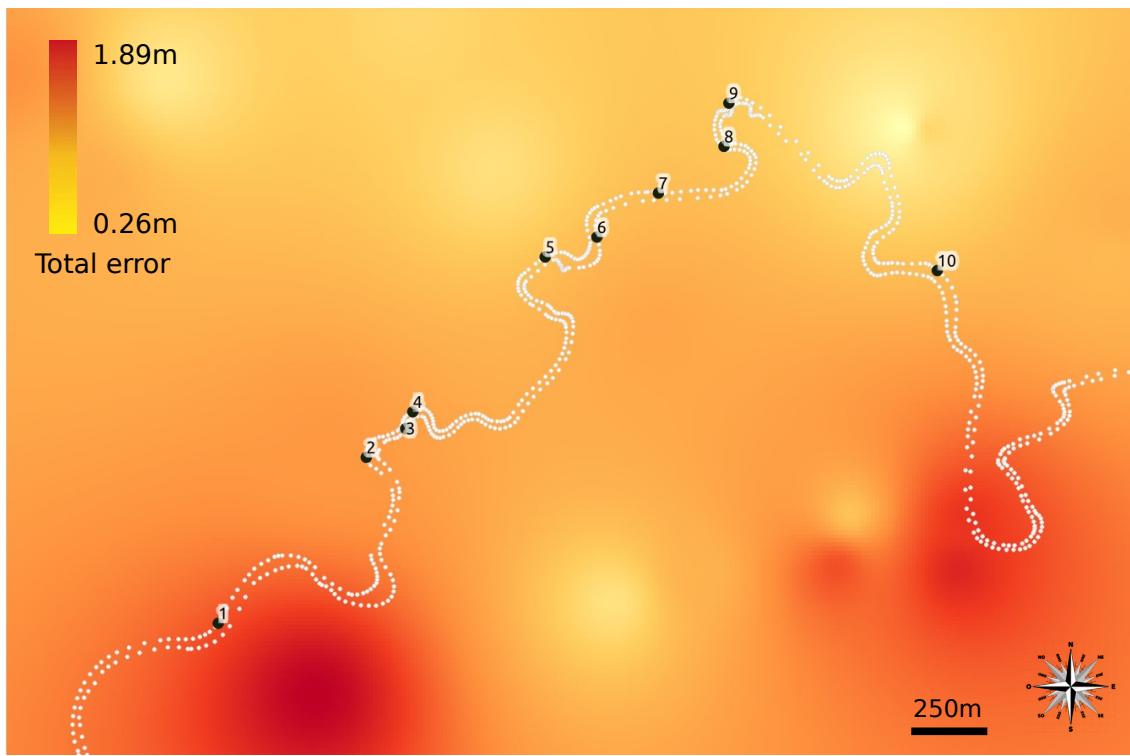

Figure 1 : 10 channel nodes randomly selected for the verification of the normal distribution of local errors in a 5m circular buffer zone in 1950.

| Table 1 : Results of Shapiro-tests calculated from the local Error X distribution around nodes in 1950 |              |         |
|--------------------------------------------------------------------------------------------------------|--------------|---------|
| Node                                                                                                   | Shapiro test | p-value |
| Num 1                                                                                                  | 0,9734       | 0,1059  |
| Num 2                                                                                                  | 0,9695       | 0,0668  |
| Num 3                                                                                                  | 0,9600       | 0,0162  |
| Num 4                                                                                                  | 0,9729       | 0,0992  |
| Num 5                                                                                                  | 0,9751       | 0,1303  |
| Num 6                                                                                                  | 0,9692       | 0,0584  |
| Num 7                                                                                                  | 0,9713       | 0,0688  |
| Num 8                                                                                                  | 0,9720       | 0,0875  |
| Num 9                                                                                                  | 0,9730       | 0,0966  |
| Num 10                                                                                                 | 0,9740       | 0,1154  |

| Table 2 : Results Shapiro-tests calculated from the local Error Y distribution around nodes in 1950 |              |         |
|-----------------------------------------------------------------------------------------------------|--------------|---------|
| Node                                                                                                | Shapiro test | p-value |
| Num 1                                                                                               | 0,9761       | 0,1560  |
| Num 2                                                                                               | 0,9710       | 0,0825  |
| Num 3                                                                                               | 0,9718       | 0,0849  |
| Num 4                                                                                               | 0,9747       | 0,1282  |
| Num 5                                                                                               | 0,9657       | 0,0336  |
| Num 6                                                                                               | 0,9692       | 0,0587  |
| Num 7                                                                                               | 0,9723       | 0,0800  |
| Num 8                                                                                               | 0,9696       | 0,0621  |
| Num 9                                                                                               | 0,9751       | 0,1296  |
| Num 10                                                                                              | 0,9762       | 0,1567  |

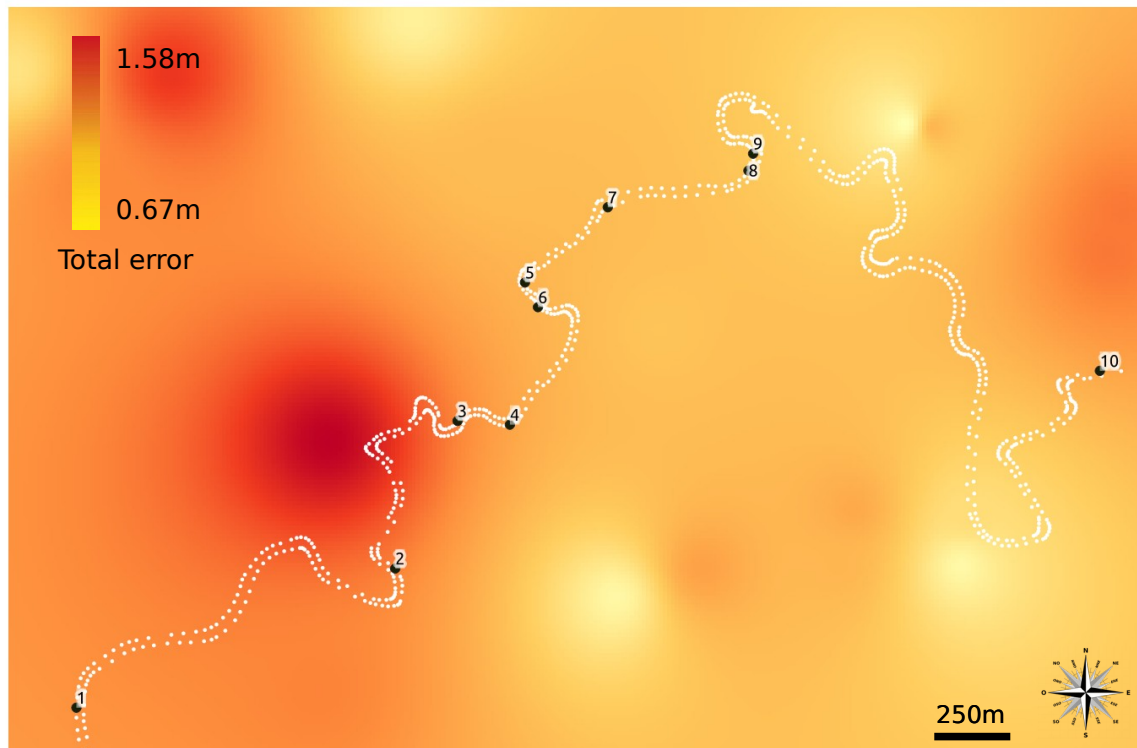

Figure 2 : 10 channel nodes randomly selected for the verification of the normal distribution of local errors in a 5m circular buffer zone in 1964

Table 3 : Results of Shapiro-tests calculated from the local Error X distribution around nodes in 1964

| Node   | Shapiro test | p-value |
|--------|--------------|---------|
| Num 1  | 0,9643       | 0,0275  |
| Num 2  | 0,9764       | 0,1803  |
| Num 3  | 0,9748       | 0,1199  |
| Num 4  | 0,9742       | 0,1294  |
| Num 5  | 0,9752       | 0,1372  |
| Num 6  | 0,9721       | 0,0847  |
| Num 7  | 0,9736       | 0,1048  |
| Num 8  | 0,9763       | 0,1667  |
| Num 9  | 0,9738       | 0,1080  |
| Num 10 | 0,9760       | 0,1540  |

Table 4 : Results of Shapiro-tests calculated from the local Error Y distribution around nodes in 1964

| Node   | Shapiro test | p-value |
|--------|--------------|---------|
| Num 1  | 0,9709       | 0,0712  |
| Num 2  | 0,9661       | 0,0442  |
| Num 3  | 0,9757       | 0,1363  |
| Num 4  | 0,9726       | 0,1033  |
| Num 5  | 0,9743       | 0,1203  |
| Num 6  | 0,9641       | 0,0271  |
| Num 7  | 0,9735       | 0,1035  |
| Num 8  | 0,9744       | 0,1270  |
| Num 9  | 0,9712       | 0,0747  |
| Num 10 | 0,9756       | 0,1439  |

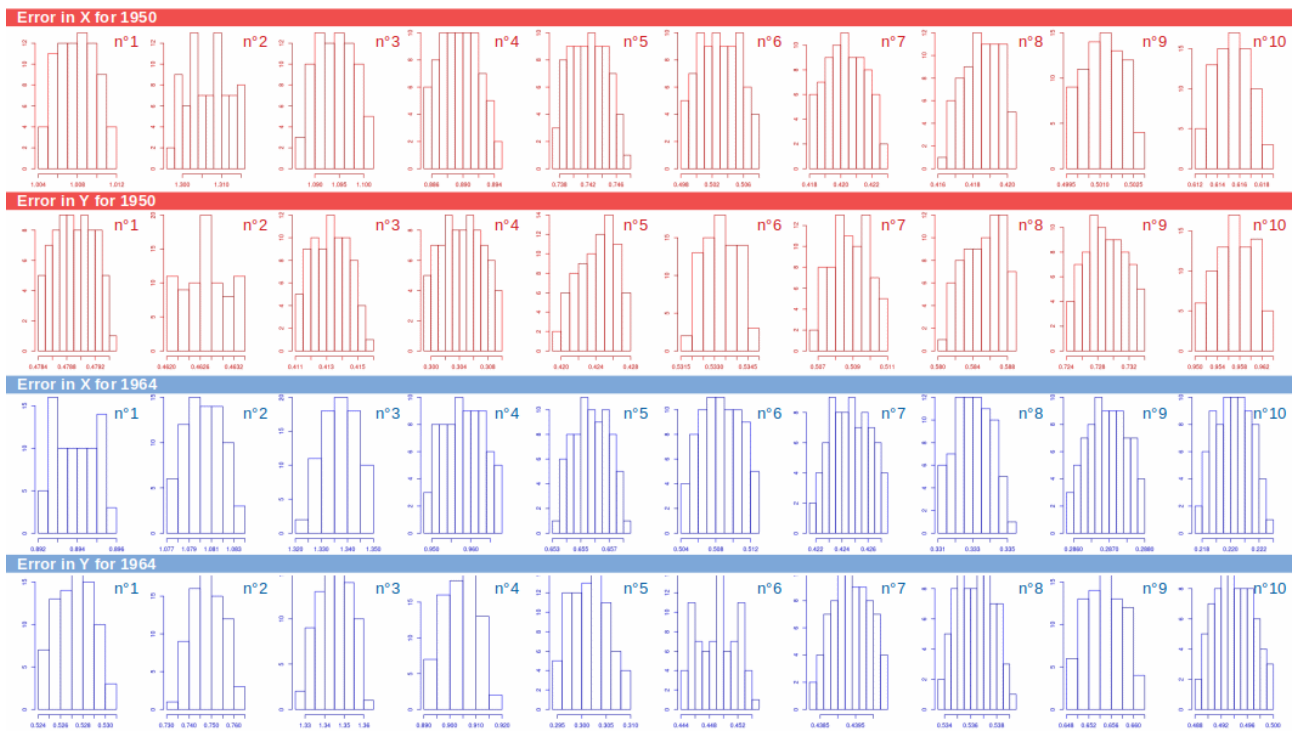

Figure 3 : Histogram distribution of local error in X and Y for 10 channel nodes randomly selected in 1950 and 1964 (see Figure 1 and 2 for visualizing the location of nodes).
