# Supplementary material for: Short communication: Significance assessment of historical surfacicplanform changes of mid-sized rivers: A Monte-Carlo basedapproach
Source: Copernicus journal article supplement (doi:10.5194/esurf-2019-52), 2019-11-05

SV-error in X (1964)

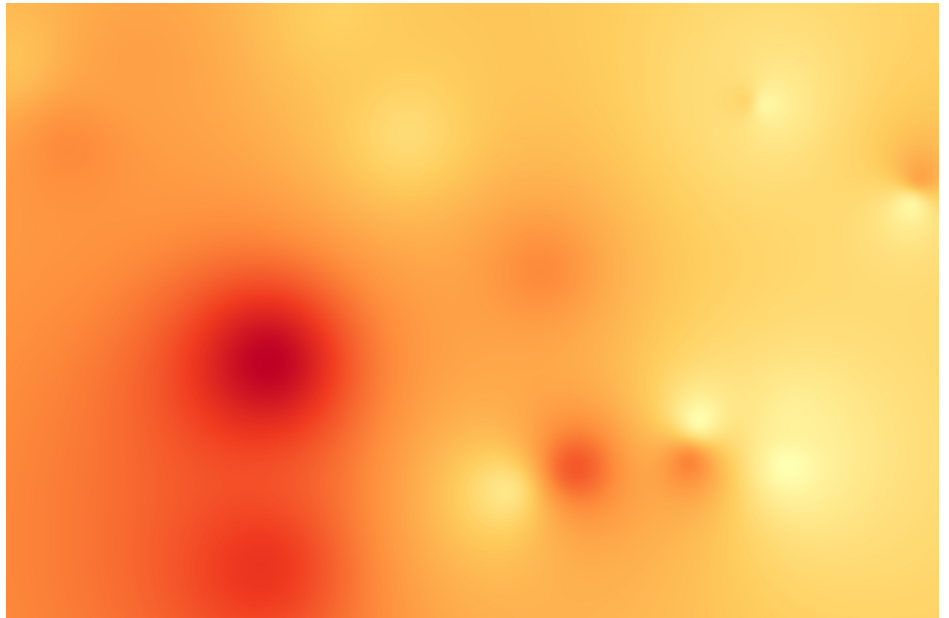

SV-error in Y (1964)

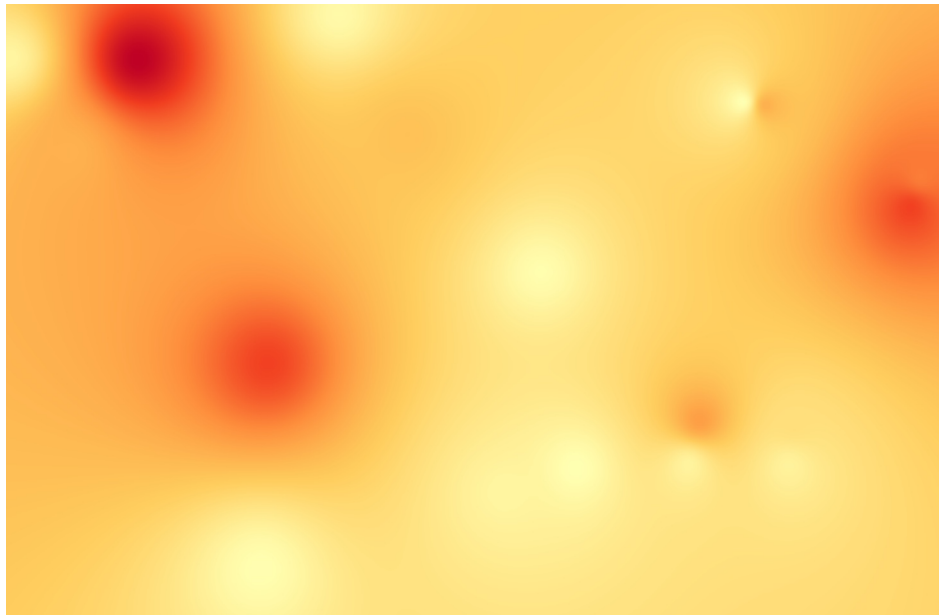

Total error (1964)

Ground control points

- hard
- soft

TotalError (m)

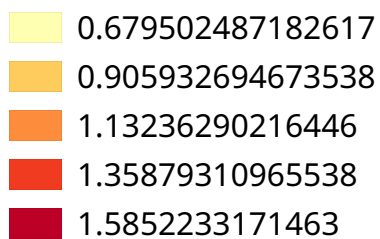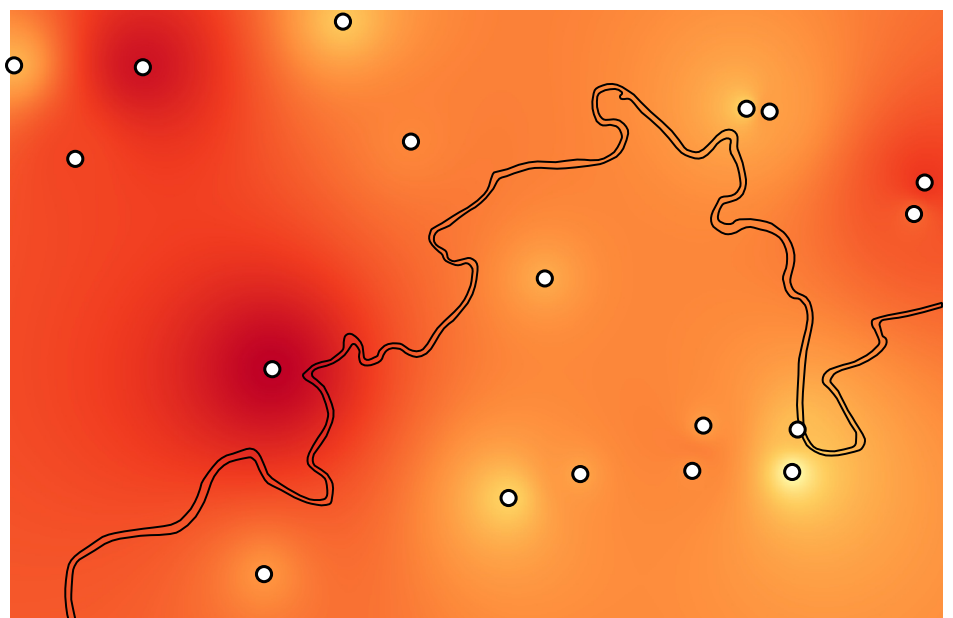

Supplement: Supplementary file [file esurf-2019-52-AC1-supplement.zip]
